# Supplementary material for: Intranasal Inoculation with Classical Swine Fever Virus Provided a More Consistent Experimental Disease Model Compared to Oral Inoculation
Source: MDPI journal article supplement (doi:10.3390/vetsci11020056), 2024-01-28
Supplement: s1 [file s1]

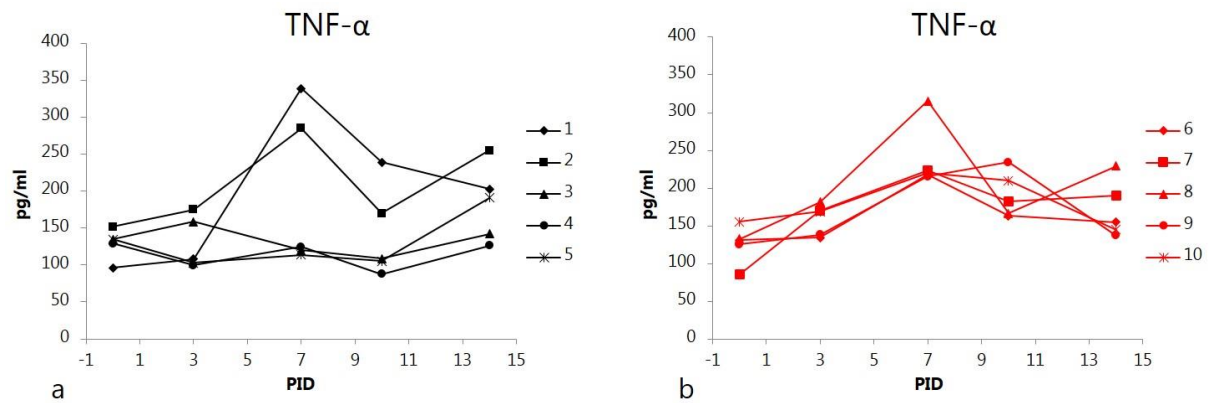

**Supplementary Figure S1.** Variations over time in TNF- $\alpha$  concentration in the peripheral blood of individual pigs orally (ORAL group; a) or intranasally (NASAL group; b) inoculated with classical swine fever virus strain Paderborn. PID = post-inoculation day.

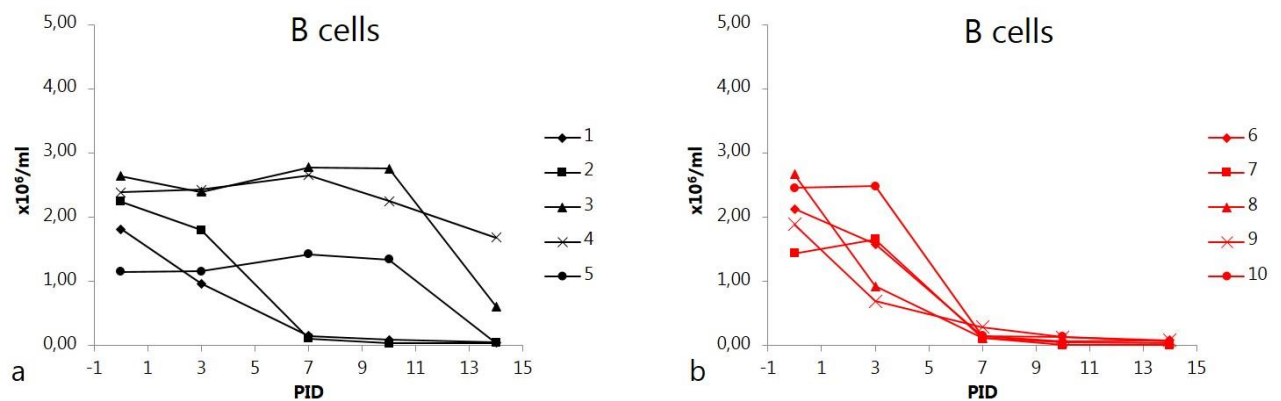

**Supplementary Figure S2.** Variations over time in absolute numbers of B cells in the peripheral blood of individual pigs orally (ORAL group; a) or intranasally (NASAL group; b) inoculated with classical swine fever virus strain Paderborn. PID = post-inoculation day.



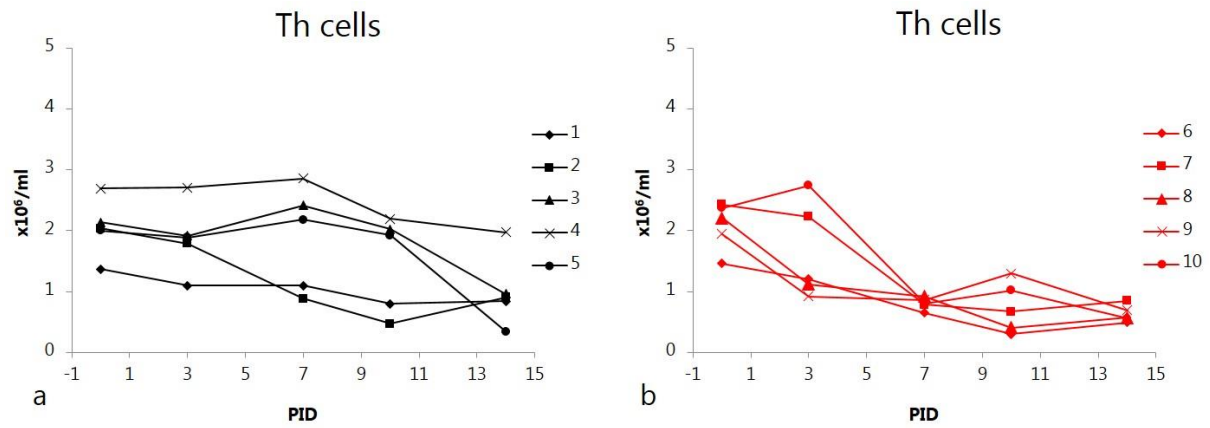

**Supplementary Figure S3.** Variations over time in absolute numbers of T helper (Th) cells in the peripheral blood of individual pigs orally (ORAL group; a) or intranasally (NASAL group; b) inoculated with classical swine fever virus strain Paderborn. PID = post-inoculation day.

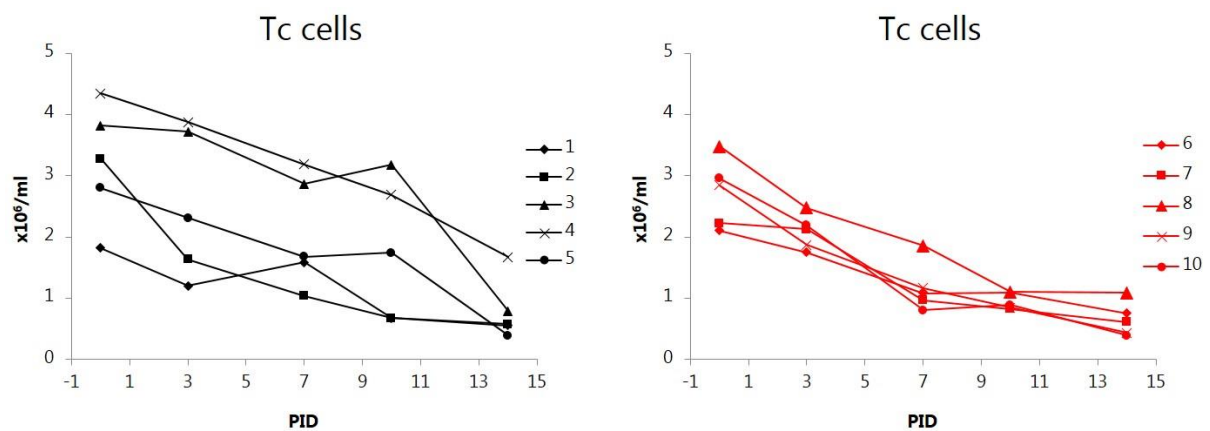



**Supplementary Figure S4.** Variations over time in absolute numbers of cytotoxic T (Tc) cells in the peripheral blood of individual pigs orally (ORAL group; a) or intranasally (NASAL group; b) inoculated with classical swine fever virus strain Paderborn. PID = post-inoculation day.
